# Supplementary material
Source: PubMed Central journal article supplement (PMC4393431)
Supplement: AEM.00067-15_zam999116205so1.pdf [file AEM.00067-15_zam999116205so1.pdf]

## **Supplementary methods**

### **Field sites**

Glenrock and Bogo woodlands were relatively open and Glenrock had scattered individuals of *A. dealbata*, whilst at Bogo there were no acacias present. At Glenrock and Bogo patches of native Australian grasses were more frequent than at Talmo, whilst still not being extensive, and some exotic grasses were also present at the Bogo woodland plot. The sites were chosen within 15 km of each other to minimise variability in microclimate. The distances between pairs of pasture and woodland plots were: Talmo, 160 m; Glenrock, 200 m; and Bogo, 440 m. At each site, woodland plots were located at slightly higher elevation than pastures and flux of fertilisers and minerals to the woodlands was therefore minimised. The close proximity between plots also minimised differences in parent soil type. Each plot (100 x 100 m) was gridded by 25 m intervals, and samples were taken at all grid intersections (see appendix Fig. S1). For three of the 25 m<sup>2</sup> subplots within each plot, additional samples were taken at 12.5 m intervals.

### **Soil biogeochemistry analysis**

Soil organic C fractions (particulate-, humus- and resistant-organic carbon (POC, HOC and ROC) and clay composition were determined using diffuse reflectance mid-infra red (MIR) spectra (Nicolet 6700 FTIR spectrometer equipped with a KBr beam-splitter and a DTGS detector, Thermo Fisher Scientific Inc, MA, USA) acquired over 8000 – 4000 cm<sup>-1</sup> (resolution of 8 cm<sup>-1</sup>). Organic C fractions were determined as described in Baldock *et al.* (1) and clay content was estimated using the prediction algorithms of Janik and Skjemstad (2). The level of confidence in the predicted data was deemed appropriate after assessment of the associated error statistics which were below the respective thresholds (inlier/outlier ratio <1

for Baldock *et al.* (1); F-statistic <3 for Janik and Skjemstad (2) indicating that the overall spectral characteristics of the soils were represented within the wider calibration dataset. However, it is acknowledged that the calibration datasets are largely representative of Australian agricultural soils and not woodland soils.

### **GH48 primer design**

The primer pair (GH48\_F1: 5'-RRCATBTACGGBATGCACTGGCT-3' and GH48\_R1: 5'-VCCGCCCCABGMGTARTACC-3') amplified a region of the GH48 catalytic region varying from 483 bp to 513 bp. Primer specificity was tested using MFE-primer 2.0 (3), using a wide range of in-silico PCR conditions ( $T_m$  from 47 to 80°C, product size from 400 to 600 bp and a PPC cut off of 30%) which allowed the detection of non-specific amplification products even if these are unlikely under the PCR conditions used in the laboratory. We further confirmed specificity by cloning and sequencing PCR products.

The inclusion of GH48 sequences from *Cellulomonas* spp., *Jonesia denitrificans* and *Xylanimonas cellulositytica* led to a high number of degenerate bases in the primers and increased mismatches between primers and target sequences. Therefore the sequences from those species were removed from the alignment and a second primer pair was designed specifically for these species. The second primer pair (GH48\_F1\_cell: 5'-AYGTCGACAACRTSTACGGMTWCG-3' and GH48\_R1\_cell: 5'-CCGCCCCASGCSWWRTACC-3') was also used for cloning and T-RFLP analysis, however the diversity recovered with both primer pairs was similar and in-silico analysis of primer specificity indicated that primer pair 1 (GH48\_F1 and GH48\_R1) would also amplify the GH48 gene from *Jonesia denitrificans* and *Xylanimonas cellulositytica*.

### **GH48 qPCR primer design**

The primer sequences were qPCR\_GH48\_F8: 5'-GCCADGHTBGGCGACTACCT-3' and qPCR\_GH48\_R5: 5'-CGCCCCABGMSWWGTACCA-3'. The pair designed here has similar lengths (19 or 20 bp), melting temperatures (55-60°C) and amplify a region of 150 bp. In-silico specificity was assessed using MFEprimer 2.0 (T<sub>m</sub> from 47 to 80°C, product size from 100 to 300 bp and a PPC cut off of 30%) (3). Amplification was tested using DNA from soil, GH48 clones obtained with the PCR primers described above (GH48\_F1 and GH48\_R1) and DNA from a local soil actinomycete isolate. Following amplification of soil DNA, visual inspection of PCR products revealed the presence of expected sizes, and sequencing of 8 soil clones showed that all high quality sequence clones obtained had top BLASTn hits to actinobacterial GH48 sequences.

### **Supplementary methods references**

1. **Baldock JA, Hawke B, Sanderman J, Macdonald LM.** 2013. Predicting contents of carbon and its component fractions in Australian soils from diffuse reflectance mid-infrared spectra. *Soil Res* **51**:577-583.
2. **Janik LJ, Skjemstad JO.** 1995. Characterization and analysis of soils using midinfrared partial least-squares 2. Correlations with some laboratory data. *Australian Journal of Soil Research* **33**:637-650.
3. **Qu W, Zhou Y, Zhang Y, Lu Y, Wang X, Zhao D, Yang Y, Zhang C.** 2012. MFEprimer-2.0: a fast thermodynamics-based program for checking PCR primer specificity. *Nucleic Acids Res* **40**:W205-W208.

## Supplementary tables

Table S1: Results of in-silico analysis of GH48 primer specificity using MFEprimer. Primer specificity using a wide range of in-silico PCR conditions (T<sub>m</sub> from 47 to 80°C, product size from 100 to 300 bp (qPCR primers) and 400 to 600 bp (standard PCR primers) and a PPC cut off of 30%).

| qPCR_GH48_F8 - qPCR_GH48_R5 |               |                                      |
|-----------------------------|---------------|--------------------------------------|
| Sequence name               | highest score | PPC Species name                     |
| CP000481                    | 96.4          | <i>Acidothermus cellulolyticus</i>   |
| CP006259                    | 96.4          | <i>Streptomyces collinus</i>         |
| FR845719                    | 96.4          | <i>Streptomyces venezuelae</i>       |
| CP000667                    | 96.4          | <i>Salinispora tropica</i> CNB-440   |
| CP000850                    | 96.4          | <i>Salinispora arenicola</i> CNS-205 |
| CP001630                    | 96.4          | <i>Actinosynnema mirum</i>           |
| CP001814                    | 96.4          | <i>Streptosporangium roseum</i>      |
| CP002162                    | 96.4          | <i>Micromonospora aurantiaca</i>     |
| CP002399                    | 96.4          | <i>Micromonospora</i> sp. L5         |
| L38827                      | 96.4          | <i>Cellulomonas fimi</i>             |
| CP002047                    | 96.4          | <i>Streptomyces bingchenggensis</i>  |
| CP003720                    | 96.4          | <i>Streptomyces hygrosopicus</i>     |
| CP003170                    | 96.4          | <i>Actinoplanes</i> sp. SE50/110     |
| AP012319                    | 96.4          | <i>Actinoplanes missouriensis</i>    |
| CP000088                    | 95            | <i>Thermobifida fusca</i>            |
| CP001964                    | 95            | <i>Cellulomonas flavigena</i>        |
| AP010968                    | 86.4          | <i>Kitasatospora setae</i>           |
| AL939128                    | 78.3          | <i>Streptomyces coelicolor</i>       |
| CP002993                    | 78.3          | <i>Streptomyces</i> sp. SirexAA-E    |
| FN554889                    | 78.3          | <i>Streptomyces scabiei</i>          |
| CP001874                    | 78.3          | <i>Thermobispora bispora</i>         |
| CP002040                    | 78.3          | <i>Nocardioopsis dassonvillei</i>    |
| CP003729                    | 78.3          | <i>Amycolatopsis mediterranei</i>    |
| CP002665                    | 76.1          | <i>Cellvibrio gilvus</i>             |

| GH48_F1-GH48_R1 |               |                                    |
|-----------------|---------------|------------------------------------|
| Sequence name   | highest score | PPC Species name                   |
| CP000481        | 90.1          | <i>Acidothermus cellulolyticus</i> |
| AP012319        | 90.1          | <i>Actinoplanes missouriensis</i>  |
| CP005929        | 90.1          | <i>Actinoplanes</i> sp. N902-109   |
| CP006272        | 90.1          | <i>Actinoplanes friuliensis</i>    |
| CP001630        | 90.1          | <i>Actinosynnema mirum</i>         |

|             |      |                                      |
|-------------|------|--------------------------------------|
| CP001700    | 90.1 | <i>Catenulispora acidiphila</i>      |
| NC_007645.1 | 90.1 | <i>Hahella chejuensis</i>            |
| CP001706    | 90.1 | <i>Jonesia denitrificans</i>         |
| CP000850    | 90.1 | <i>Salinispora arenicola</i> CNS-205 |
| CP000667    | 90.1 | <i>Salinispora tropica</i> CNB-440   |
| BA000030    | 90.1 | <i>Streptomyces avermitilis</i>      |
| AL939128    | 90.1 | <i>Streptomyces coelicolor</i>       |
| FN554889    | 90.1 | <i>Streptomyces scabiei</i>          |
| CP001814    | 90.1 | <i>Streptosporangium roseum</i>      |
| CP000088    | 90.1 | <i>Thermobifida fusca</i>            |
| CP001874    | 90.1 | <i>Thermobispora bispora</i>         |
| CP001821    | 90.1 | <i>Xylanimonas cellulositytica</i>   |
| CP002040    | 87   | <i>Nocardiosis dassonvillei</i>      |
| CP003170    | 79.6 | <i>Actinoplanes</i> sp. SE50/110     |
| HE971709    | 79.6 | <i>Streptomyces davawensis</i>       |
| CP009124    | 79.6 | <i>Streptomyces lividans</i>         |
| CP009438    | 79.6 | <i>Streptomyces glaucescens</i>      |
| CP003729    | 79.6 | <i>Amycolatopsis mediterranei</i>    |
| AP010968    | 79.6 | <i>Kitasatospora setae</i>           |
| CP002162    | 79.6 | <i>Micromonospora aurantiaca</i>     |
| CP002399    | 79.6 | <i>Micromonospora</i> sp. L5         |
| CP002638    | 79.6 | <i>Verrucosispora maris</i>          |

#### GH48\_F1\_cell-GH48\_R1\_cell

| Sequence name | highest score | PPC | Species name                       |
|---------------|---------------|-----|------------------------------------|
| BA000030      | 83.6          |     | <i>Streptomyces avermitilis</i>    |
| CP005929      | 83.6          |     | <i>Actinoplanes</i> sp. N902-109   |
| LK022848      | 83.6          |     | <i>Streptomyces iranensis</i>      |
| CP009124      | 83.6          |     | <i>Streptomyces lividans</i>       |
| CP009438      | 83.6          |     | <i>Streptomyces glaucescens</i>    |
| CP006567      | 83.6          |     | <i>Streptomyces rapamycinicus</i>  |
| CP006259      | 83.6          |     | <i>Streptomyces collinus</i>       |
| FR845719      | 83.6          |     | <i>Streptomyces venezuelae</i>     |
| CP001630      | 83.6          |     | <i>Actinosynnema mirum</i>         |
| CP001706      | 83.6          |     | <i>Jonesia denitrificans</i>       |
| CP001821      | 83.6          |     | <i>Xylanimonas cellulositytica</i> |
| FN554889      | 83.6          |     | <i>Streptomyces scabiei</i> 87.22  |
| CP001964      | 83.6          |     | <i>Cellulomonas flavigena</i>      |
| CP002638      | 83.6          |     | <i>Verrucosispora maris</i>        |
| L38827        | 83.6          |     | <i>Cellulomonas fimi</i>           |
| CP002993      | 83.6          |     | <i>Streptomyces</i> sp. SirexAA-E  |
| AP010968      | 83.6          |     | <i>Kitasatospora setae</i>         |
| CP002047      | 83.6          |     | <i>Streptomyces bingchengensis</i> |
| CP003720      | 83.6          |     | <i>Streptomyces hygroscopicus</i>  |
| CP006272      | 82.2          |     | <i>Actinoplanes friuliensis</i>    |
| CP000481      | 79.2          |     | <i>Acidothermus cellulolyticus</i> |

|          |      |                                  |
|----------|------|----------------------------------|
| HE971709 | 79.2 | <i>Streptomyces davawensis</i>   |
| CP001874 | 79.2 | <i>Thermobispora bispora</i>     |
| CP002399 | 79.2 | <i>Micromonospora</i> sp. L5     |
| CP003170 | 79.2 | <i>Actinoplanes</i> sp. SE50/110 |
| CP002665 | 58.6 | <i>Cellvibrio gilvus</i>         |

---

Table S2: Summary of actinobacterial GH48 genes amplified by each primer pair according to MFEprimer analysis.

| Species                                           | qPCR_GH48_F8      |                     |                               |
|---------------------------------------------------|-------------------|---------------------|-------------------------------|
|                                                   | -<br>qPCR_GH48_R5 | GH48_F1-<br>GH48_R1 | GH48_F1_cell-<br>GH48_R1_cell |
| CP001630 <i>Actinosynnema mirum</i>               | x                 | x                   | x                             |
| CP002040 <i>Nocardiopsis dassonvillei</i>         | x                 | x                   |                               |
| CP000481 <i>Acidothermus cellulolyticus</i>       | x                 | x                   |                               |
| CP000850 <i>Salinispora arenicola</i>             | x                 | x                   |                               |
| CP000667 <i>Salinispora tropica</i>               | x                 | x                   |                               |
| CP001874 <i>Thermobispora bispora</i>             | x                 | x                   | x                             |
| CP001821 <i>Xylanimonas cellulosilytica</i>       |                   | x                   | x                             |
| AP012319 <i>Actinoplanes missouriensis</i>        | x                 | x                   |                               |
| CP005929 <i>Actinoplanes</i> sp. N902-109         |                   | x                   | x                             |
| CP003170 <i>Actinoplanes</i> sp. SE50/110         | x                 | x                   | x                             |
| CP006272 <i>Actinoplanes friuliensis</i>          |                   | x                   | x                             |
| CP001700 <i>Catenulispora acidiphila</i>          |                   | x                   |                               |
| L38827 <i>Cellulomonas fimi</i>                   | x                 |                     | x                             |
| CP001964 <i>Cellulomonas flavigena</i>            | x                 |                     | x                             |
| CP001706 <i>Jonesia denitrificans</i>             |                   | x                   | x                             |
| AP010968 <i>Kitasatospora setae</i>               | x                 | x                   | x                             |
| CP002399 <i>Micromonospora</i> sp. L5             | x                 | x                   | x                             |
| CP002162 <i>Micromonospora aurantiaca</i>         | x                 | x                   | x                             |
| AL939128 <i>Streptomyces coelicolor</i>           | x                 | x                   |                               |
| HE971709 <i>Streptomyces davawensis</i>           |                   | x                   | x                             |
| BA000030 <i>Streptomyces avermitilis</i>          |                   | x                   | x                             |
| CP003720 <i>Streptomyces hygrosopicus</i>         | x                 |                     | x                             |
| CP002047 <i>Streptomyces bingchengensis</i>       | x                 |                     | x                             |
| CP003990 <i>Streptomyces</i> sp. PAMC26508        |                   |                     |                               |
| CP002475 <i>Streptomyces pratensis</i>            |                   |                     |                               |
| LK022848 <i>Streptomyces iranensis</i>            |                   |                     | x                             |
| CP009124 <i>Streptomyces lividans</i>             |                   | x                   | x                             |
| CP009438 <i>Streptomyces glaucescens</i>          |                   | x                   | x                             |
| CP006567 <i>Streptomyces rapamycinicus</i>        |                   |                     | x                             |
| CP006259 <i>Streptomyces collinus</i>             | x                 |                     | x                             |
| FR845719 <i>Streptomyces venezuelae</i>           | x                 |                     | x                             |
| CP002993 <i>Streptomyces</i> sp. SirexAA-FN554889 | x                 |                     | x                             |
| (C9ZEQ0) <i>Streptomyces scabiei</i>              | x                 | x                   | x                             |
| FN554889 <i>Streptomyces scabiei</i> (C9Z9L6)     |                   |                     |                               |
| CP001814 <i>Streptosporangium roseum</i>          | x                 | x                   |                               |

|                                            |   |   |   |
|--------------------------------------------|---|---|---|
| CP000088 <i>Thermobifida fusca</i>         | x | x |   |
| CP002638 <i>Verrucosipora maris</i>        |   | x | x |
| CP003729 <i>Amycolatopsis mediterranei</i> | x | x |   |
| CP002665 <i>Cellvibrio gilvus</i>          | x |   | x |

Table S3: Percentage of GH48 clones showing the presence of conserved residues with known function in cellobiohydrolase function. Residues numbers are according to the Cel48F gene from *Clostridium cellulolyticum* H10.

| Residue | Clones with residue (%) | Function                          | Presence in <i>T. fusca</i> GH48 protein |
|---------|-------------------------|-----------------------------------|------------------------------------------|
| N178    | 100                     | Hydrogen bonding                  | yes                                      |
| F180    | 57%                     | Hydrophobic stacking interactions | no                                       |
| Q181    | 100                     | Hydrogen bonding                  | yes                                      |
| G183    | 100                     | Hydrogen bonding                  | yes                                      |
| Q185    | 47%                     | Calcium coordination              | no                                       |
| E186    | 100                     | Hydrogen bonding                  | yes                                      |
| E190    | 71%                     | Calcium coordination              | yes                                      |
| Q222    | 100                     | Hydrogen bonding                  | yes                                      |
| T226    | 88.7%                   | Hydrogen bonding                  | yes                                      |
| K274    | 98.7%                   | Hydrogen bonding                  | yes                                      |
| Y275    | 96%                     | Hydrogen bonding                  | yes                                      |
| W298    | 98.7%                   | Hydrogen bonding                  | yes                                      |



## Supplementary figures

Figure S1

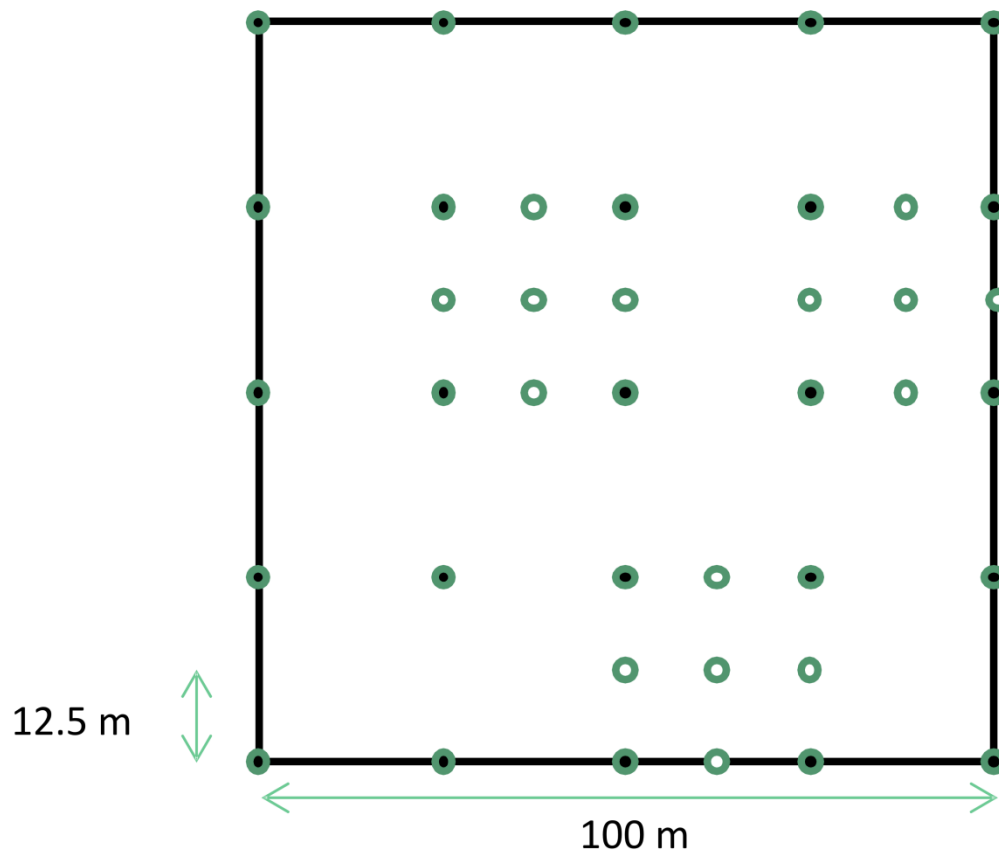

Figure S1. Sampling grid used in this study. The 1 hectare plots were gridded by 25 m intervals, and samples were taken at all grid intersections. For three of the 25 m<sup>2</sup> subplots within each plot, additional samples were taken at 12.5 m intervals.

Figure S2

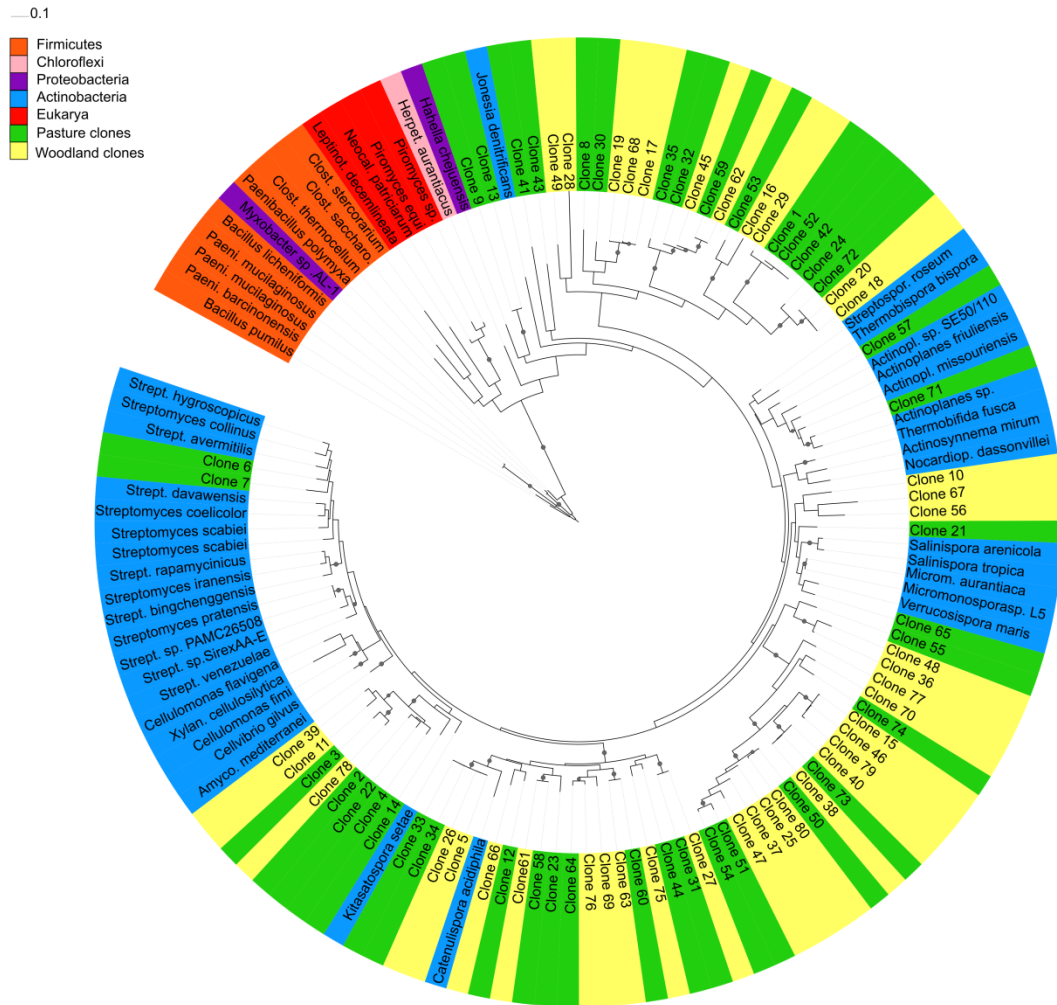

Figure S2. Maximum likelihood tree (PhyML) constructed with GH48 sequences from soil clones and cultured strains from Actinobacteria, Firmicutes, Neocallimastigales (anaerobic fungi), Proteobacteria, Chloroflexi and Insecta. Nodes in tree branches indicate bootstrap support > 0.8. Sequences from *Bacillus* spp. and *Paenibacillus* spp. were used as outgroups. Sequence accessions are indicated following strain name. Colours indicate sequence taxonomy or soil clone provenance. TW, Talmo woodland; GW, Glenrock woodland; BW, Bogo woodland; TP, Talmo pasture; GP, Glenrock pasture; BP, Bogo pasture.
